# Supplementary material
Source: publisher figshare collection journal article supplement (https://karger.figshare.com/ndownloader/files/28365867)
Supplement: Supplementary file 1 [file 28365867]

**Table S1:** Parameter assessed.

|  | **Parameter** |
| --- | --- |
| **Clinical data** | - Ascites - BMI - Diabetes - ECOG - Etiology - Hepatic encephalopathy - Liver cirrhosis - Portal vein thrombosis |
| **Tumor related data** | - Bilobar involvement - Distant metastasis - Histological confirmation - Lymphnodes ≥1 cm - Number of tumor nodes - Tumor burden ≤ 50%/> 50% - Tumor extension (singular <2cm, single or 3 nodules<3cm, multinodular, vascular invasion, N1, M1) - Tumor size ≥7cm - Up-to-seven criteria |
| **Laboratory parameters** | - AFP (ng/ml) - Albumin (g/dl) - AP (U/l) - Bilirubin (mg/dl) - CRP (mg/dl) - GGT (U/l) - GOT (U/l) - GPT (U/l) - Hemoglobin (g/dl) - INR - Creatinine (mg/dl) - LDH (U/l) - Platelets (T/µl) |
| **Staging Systems/prognostic scores** | - ALBI - Child-Pugh - BCLC - CLIP - GETCH - HAP - JIS - M-TACE - MELD - Okuda - STATE - TNM |
